# Supplementary material for: Modeling the effect of vaccination strategies in an Excel spreadsheet: The rate of vaccination, and not only the vaccination coverage, is a determinant for containing COVID-19 in urban areas
Source: bioRxiv or medRxiv preprint supplement (doi:10.1101/2021.01.06.21249365), 2021-01-09
Supplement: Supplementary file [file media-2.pdf]

1 **Modeling the effect of vaccination strategies in an Excel spreadsheet: The**  
2 **rate of vaccination, and not only the vaccination coverage, is a**  
3 **determinant for containing COVID-19 in urban areas**

4 **Supplementary information**

5 Mario Moisés Alvarez<sup>1,2\*</sup>, Sergio Bravo-González<sup>1,2</sup>, and Grissel Trujillo-de Santiago<sup>1,3</sup>

6

7 <sup>1</sup>Centro de Biotecnología-FEMSA, Tecnológico de Monterrey, Monterrey 64849, NL, México

8 <sup>2</sup>Departamento de Bioingeniería, Escuela de Ingeniería y Ciencias, Tecnológico de Monterrey,

9 Monterrey 64849, NL, México

10 <sup>3</sup>Departamento de Ingeniería Mecatrónica y Eléctrica, Escuela de Ingeniería y Ciencias,

11 Tecnológico de Monterrey, Monterrey 64849, NL, México

12 (\*) corresponding author: [mario.alvarez@tec.mx](mailto:mario.alvarez@tec.mx)

13

14

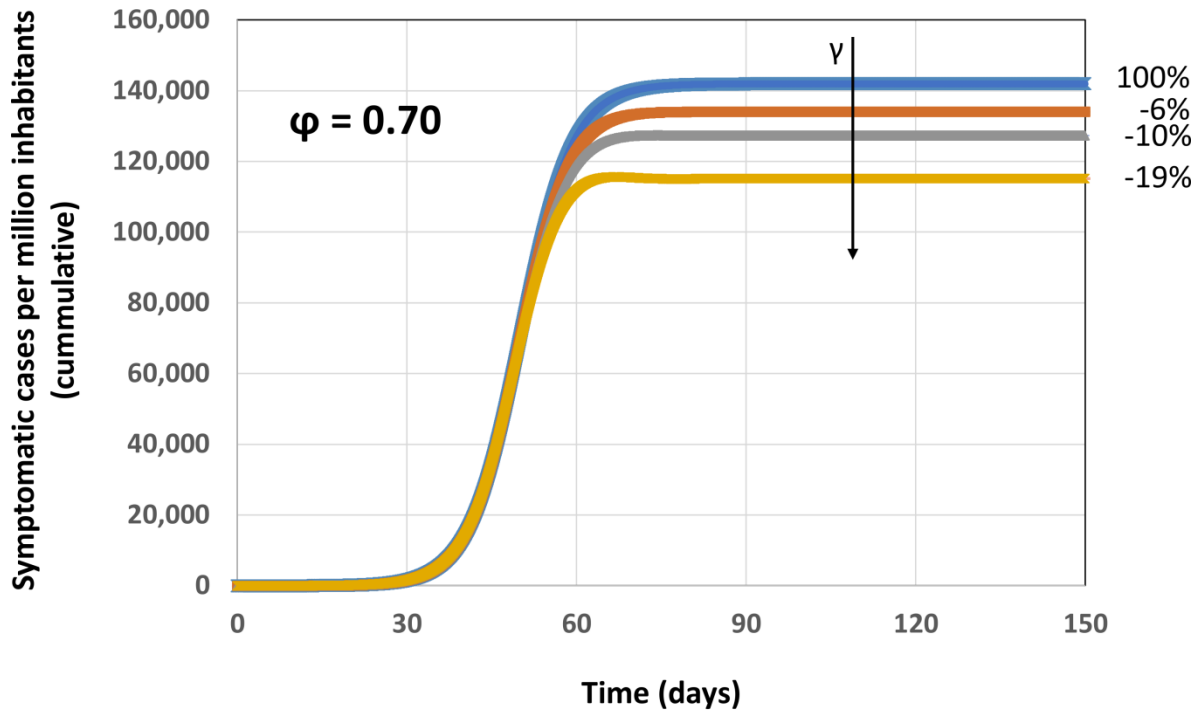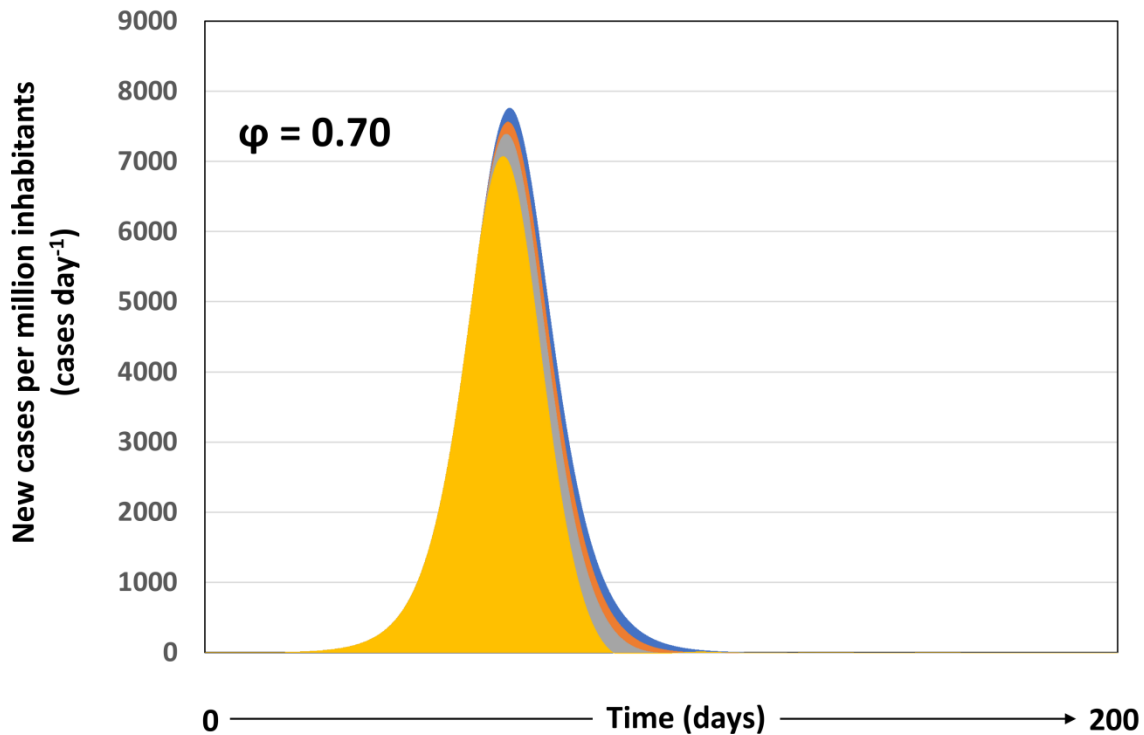

15  
16

17 **Figure S1. Scenarios of pandemic evolution during the vaccination of 70% of the**  
 18 **population at different vaccination rates under conditions of modest social distancing**  
 19 **(i.e., 25%). (A) The cumulative number of infections, (B) the number of new infections per**  
 20 **day and the maximum bed occupancy (inset) are presented for vaccination scenarios in**

21 which the vaccine coverage is kept constant at 70%  $P_o$  ( $\varphi=0.70$ ), the effectiveness of the  
 22 social distancing measures is 20% ( $\sigma=0.20$ ), a basal level of testing is established ( $\alpha=0.15$ ),  
 23 and different vaccination rates are imposed, such that: the entire population could be  
 24 vaccinated within a year (vaccination at  $\gamma=0.0027 P_o \text{ day}^{-1}$ ; orange curve), within six  
 25 months (vaccination at  $\gamma=0.0054 P_o \text{ day}^{-1}$ ; grey curve), or within three months (vaccination  
 26 at  $\gamma=0.0108 P_o \text{ day}^{-1}$ ; yellow curve). A reference scenario without vaccination is included  
 27 (blue line). Numbers indicate the percentage of reduction of symptomatic cases that results  
 28 from the application of each vaccination rate with respect to the reference case.

29

30

31

32 **Table S1.** Specific infection rates ( $\mu_o$ ) and the associated doubling times ( $t_d$ ) for COVID-19  
 33 infection in different geographic regions. Note that the intrinsic rate of infection ranges  
 34 between 0.30 and 0.37 for territories with population densities between 4,000 and 7,000  
 35 hab km<sup>2</sup>.

36

| Territory              | Population density<br>(hab km <sup>2</sup> ) | $\mu$<br>(day <sup>-1</sup> ) | $t_d$<br>(day) |
|------------------------|----------------------------------------------|-------------------------------|----------------|
| Sao Paulo; Brazil      | ~7,000                                       | 0.308                         | 2.250          |
| Mexico City; México    | 6,000                                        | 0.329                         | 2.107          |
| Toronto; Canada        | 4,149                                        | 0.330                         | 2.100          |
| Lisbon; Portugal       | 5,476                                        | 0.341                         | 2.032          |
| Madrid; Spain          | 5,418                                        | 0.358                         | 1.937          |
| London; England        | 5,701                                        | 0.362                         | 1.915          |
| Amsterdam; Netherlands | 4,439                                        | 0.424                         | 1.635          |
| NYC; USA               | 10,194                                       | 0.666                         | 1.040          |

37

38

39

40

41

42

43

44

45

46

47 **Table S2.** Effect of different vaccination scenarios in relevant indicators of the local  
 48 evolution of pandemic COVID-19. Indicators are calculated for different vaccination  
 49 scenarios, including the day of the epidemic peak, the number of new infection cases at the  
 50 epidemic peak, the cumulative number of symptomatic infections after 150 days of the  
 51 local pandemic onset, the maximum bed occupancy, and the number of fatalities at  
 52 different case fatality rates.  
 53

| Vaccination parameters    |                               |                                                     |                     | Local pandemic indicators |               |                   |            | Case fatality rates |         |         |         |
|---------------------------|-------------------------------|-----------------------------------------------------|---------------------|---------------------------|---------------|-------------------|------------|---------------------|---------|---------|---------|
| $\eta$ : Vaccine Efficacy | $\phi$ : Vaccination Coverage | vaccination rate ( $\gamma$ Po year <sup>-1</sup> ) | vaccine equivalents | max_symptomatic           | max_new_cases | max_bed occupancy | peak @ day | 0.09                | 0.04    | 0.02    | 0.01    |
| 0.95                      | 0.30                          | 0.00                                                | 0.00                | 110736.53                 | 2885.67       | 5804.24           | 94.66      | 0.00                | 0.00    | 0.00    | 0.00    |
| 0.95                      | 0.30                          | 0.50                                                | 285000.00           | 93284.68                  | 2299.44       | 4651.22           | 95.06      | 1535.76             | 610.81  | 383.94  | 191.97  |
| 0.95                      | 0.30                          | 1.00                                                | 285000.00           | 75870.70                  | 1775.05       | 3607.71           | 94.92      | 3068.19             | 1220.30 | 767.05  | 383.52  |
| 0.95                      | 0.30                          | 1.50                                                | 285000.00           | 60820.34                  | 1329.98       | 2712.98           | 93.92      | 4392.62             | 1747.07 | 1098.16 | 549.08  |
| 0.95                      | 0.30                          | 2.00                                                | 285000.00           | 52753.41                  | 976.94        | 1997.40           | 91.89      | 5102.51             | 2029.41 | 1275.63 | 637.81  |
| 0.95                      | 0.30                          | 2.50                                                | 285000.00           | 49332.18                  | 740.92        | 1535.01           | 94.96      | 5403.58             | 2149.15 | 1350.90 | 675.45  |
| 0.95                      | 0.30                          | 3.00                                                | 285000.00           | 47699.85                  | 644.99        | 1340.75           | 100.07     | 5547.23             | 2206.28 | 1386.81 | 693.40  |
| 0.95                      | 0.30                          | 3.50                                                | 285000.00           | 46784.89                  | 598.89        | 1246.27           | 104.32     | 5627.74             | 2238.31 | 1406.94 | 703.47  |
| 0.95                      | 0.30                          | 4.00                                                | 285000.00           | 46204.29                  | 573.15        | 1193.17           | 107.57     | 5678.84             | 2258.63 | 1419.71 | 709.85  |
| 0.95                      | 0.40                          | 0.50                                                | 380000.00           | 93284.68                  | 2299.44       | 4651.22           | 95.06      | 1535.76             | 610.81  | 383.94  | 191.97  |
| 0.95                      | 0.40                          | 1.00                                                | 380000.00           | 75856.01                  | 1775.05       | 3607.71           | 94.92      | 3069.49             | 1220.82 | 767.37  | 383.69  |
| 0.95                      | 0.40                          | 1.50                                                | 380000.00           | 59319.86                  | 1329.98       | 2712.98           | 93.92      | 4524.67             | 1799.58 | 1131.17 | 565.58  |
| 0.95                      | 0.40                          | 2.00                                                | 380000.00           | 45856.77                  | 976.94        | 1997.40           | 91.89      | 5709.42             | 2270.79 | 1427.35 | 713.68  |
| 0.95                      | 0.40                          | 2.50                                                | 380000.00           | 37260.87                  | 716.28        | 1465.82           | 88.90      | 6465.86             | 2571.65 | 1616.46 | 808.23  |
| 0.95                      | 0.40                          | 3.00                                                | 380000.00           | 32212.76                  | 534.43        | 1093.37           | 85.33      | 6910.09             | 2748.33 | 1727.52 | 863.76  |
| 0.95                      | 0.40                          | 3.50                                                | 380000.00           | 29088.93                  | 411.00        | 842.92            | 86.74      | 7184.99             | 2857.67 | 1796.25 | 898.12  |
| 0.95                      | 0.40                          | 4.00                                                | 380000.00           | 26996.63                  | 327.16        | 680.96            | 86.01      | 7369.11             | 2930.90 | 1842.28 | 921.14  |
| 0.95                      | 0.50                          | 0.50                                                | 475000.00           | 93284.68                  | 2299.44       | 4651.22           | 95.06      | 1535.76             | 610.81  | 383.94  | 191.97  |
| 0.95                      | 0.50                          | 1.00                                                | 475000.00           | 75855.97                  | 1775.05       | 3607.71           | 94.92      | 3069.49             | 1220.82 | 767.37  | 383.69  |
| 0.95                      | 0.50                          | 1.50                                                | 475000.00           | 59253.45                  | 1329.98       | 2712.98           | 93.92      | 4530.51             | 1801.91 | 1132.63 | 566.31  |
| 0.95                      | 0.50                          | 2.00                                                | 475000.00           | 44678.68                  | 976.94        | 1997.40           | 91.89      | 5813.09             | 2312.02 | 1453.27 | 726.64  |
| 0.95                      | 0.50                          | 2.50                                                | 475000.00           | 33502.37                  | 716.28        | 1465.82           | 88.90      | 6796.61             | 2703.20 | 1699.15 | 849.58  |
| 0.95                      | 0.50                          | 3.00                                                | 475000.00           | 25909.36                  | 534.43        | 1093.37           | 85.33      | 7464.79             | 2968.95 | 1866.20 | 933.10  |
| 0.95                      | 0.50                          | 3.50                                                | 475000.00           | 20899.80                  | 411.00        | 839.88            | 81.64      | 7905.63             | 3144.29 | 1976.41 | 988.20  |
| 0.95                      | 0.50                          | 4.00                                                | 475000.00           | 17504.14                  | 327.16        | 667.39            | 78.13      | 8204.45             | 3263.13 | 2051.11 | 1025.56 |
| 0.95                      | 0.60                          | 0.50                                                | 570000.00           | 93284.68                  | 2299.44       | 4651.22           | 95.06      | 1535.76             | 610.81  | 383.94  | 191.97  |
| 0.95                      | 0.60                          | 1.00                                                | 570000.00           | 75855.97                  | 1775.05       | 3607.71           | 94.92      | 3069.49             | 1220.82 | 767.37  | 383.69  |
| 0.95                      | 0.60                          | 1.50                                                | 570000.00           | 59251.93                  | 1329.98       | 2712.98           | 93.92      | 4530.64             | 1801.96 | 1132.66 | 566.33  |
| 0.95                      | 0.60                          | 2.00                                                | 570000.00           | 44582.17                  | 976.94        | 1997.40           | 91.89      | 5821.58             | 2315.40 | 1455.40 | 727.70  |
| 0.95                      | 0.60                          | 2.50                                                | 570000.00           | 32839.29                  | 716.28        | 1465.82           | 88.90      | 6854.96             | 2726.40 | 1713.74 | 856.87  |
| 0.95                      | 0.60                          | 3.00                                                | 570000.00           | 24346.79                  | 534.43        | 1093.37           | 85.33      | 7602.30             | 3023.64 | 1900.57 | 950.29  |
| 0.95                      | 0.60                          | 3.50                                                | 570000.00           | 18561.72                  | 411.00        | 839.88            | 81.64      | 8111.38             | 3226.12 | 2027.85 | 1013.92 |
| 0.95                      | 0.60                          | 4.00                                                | 570000.00           | 14652.20                  | 327.16        | 667.39            | 78.13      | 8455.42             | 3362.95 | 2113.86 | 1056.93 |
| 0.95                      | 0.70                          | 0.50                                                | 665000.00           | 93284.68                  | 2299.44       | 4651.22           | 95.06      | 1535.76             | 610.81  | 383.94  | 191.97  |
| 0.95                      | 0.70                          | 1.00                                                | 665000.00           | 75855.97                  | 1775.05       | 3607.71           | 94.92      | 3069.49             | 1220.82 | 767.37  | 383.69  |
| 0.95                      | 0.70                          | 1.50                                                | 665000.00           | 59251.89                  | 1329.98       | 2712.98           | 93.92      | 4530.65             | 1801.96 | 1132.66 | 566.33  |
| 0.95                      | 0.70                          | 2.00                                                | 665000.00           | 44577.76                  | 976.94        | 1997.40           | 91.89      | 5821.97             | 2315.56 | 1455.49 | 727.75  |
| 0.95                      | 0.70                          | 2.50                                                | 665000.00           | 32767.47                  | 716.28        | 1465.82           | 88.90      | 6861.28             | 2728.92 | 1715.32 | 857.66  |
| 0.95                      | 0.70                          | 3.00                                                | 665000.00           | 24070.20                  | 534.43        | 1093.37           | 85.33      | 7626.64             | 3033.32 | 1906.66 | 953.33  |
| 0.95                      | 0.70                          | 3.50                                                | 665000.00           | 18037.42                  | 411.00        | 839.88            | 81.64      | 8157.52             | 3244.47 | 2039.38 | 1019.69 |
| 0.95                      | 0.70                          | 4.00                                                | 665000.00           | 13936.55                  | 327.16        | 667.39            | 78.13      | 8518.40             | 3388.00 | 2129.60 | 1064.80 |
| 0.90                      | 0.30                          | 0.50                                                | 270000.00           | 94207.71                  | 2328.90       | 4709.52           | 95.05      | 1454.54             | 578.51  | 363.63  | 181.82  |
| 0.90                      | 0.30                          | 1.00                                                | 270000.00           | 77684.00                  | 1826.81       | 3711.21           | 94.97      | 2908.62             | 1156.84 | 727.16  | 363.58  |
| 0.90                      | 0.30                          | 1.50                                                | 270000.00           | 63345.18                  | 1394.35       | 2842.89           | 94.15      | 4170.44             | 1658.70 | 1042.61 | 521.30  |
| 0.90                      | 0.30                          | 2.00                                                | 270000.00           | 55747.12                  | 1043.37       | 2132.43           | 92.41      | 4839.07             | 1924.63 | 1209.77 | 604.88  |
| 0.90                      | 0.30                          | 2.50                                                | 270000.00           | 52618.16                  | 811.28        | 1679.55           | 95.75      | 5114.42             | 2034.14 | 1278.60 | 639.30  |
| 0.90                      | 0.30                          | 3.00                                                | 270000.00           | 51168.80                  | 719.24        | 1493.50           | 100.61     | 5241.96             | 2084.87 | 1310.49 | 655.24  |
| 0.90                      | 0.30                          | 3.50                                                | 270000.00           | 50376.47                  | 675.32        | 1403.68           | 104.44     | 5311.68             | 2112.60 | 1327.92 | 663.96  |
| 0.90                      | 0.30                          | 4.00                                                | 270000.00           | 49884.00                  | 650.89        | 1353.42           | 107.32     | 5355.02             | 2129.84 | 1338.76 | 669.38  |
| 0.90                      | 0.40                          | 0.50                                                | 360000.00           | 94207.71                  | 2328.90       | 4709.52           | 95.05      | 1454.54             | 578.51  | 363.63  | 181.82  |
| 0.90                      | 0.40                          | 1.00                                                | 360000.00           | 77669.13                  | 1826.81       | 3711.21           | 94.97      | 2909.93             | 1157.36 | 727.48  | 363.74  |
| 0.90                      | 0.40                          | 1.50                                                | 360000.00           | 61846.48                  | 1394.35       | 2842.89           | 94.15      | 4302.32             | 1711.15 | 1075.58 | 537.79  |
| 0.90                      | 0.40                          | 2.00                                                | 360000.00           | 48826.31                  | 1043.37       | 2132.43           | 92.41      | 5448.10             | 2166.86 | 1362.02 | 681.01  |
| 0.90                      | 0.40                          | 2.50                                                | 360000.00           | 40549.04                  | 776.48        | 1588.83           | 89.76      | 6176.50             | 2456.56 | 1544.12 | 772.06  |
| 0.90                      | 0.40                          | 3.00                                                | 360000.00           | 35780.66                  | 584.55        | 1196.15           | 86.49      | 6596.12             | 2623.46 | 1649.03 | 824.51  |
| 0.90                      | 0.40                          | 3.50                                                | 360000.00           | 32893.12                  | 450.96        | 932.62            | 88.52      | 6850.22             | 2724.52 | 1712.55 | 856.28  |
| 0.90                      | 0.40                          | 4.00                                                | 360000.00           | 30993.56                  | 369.73        | 770.27            | 89.10      | 7017.38             | 2791.00 | 1754.35 | 877.17  |
| 0.90                      | 0.50                          | 0.50                                                | 450000.00           | 94207.71                  | 2328.90       | 4709.52           | 95.05      | 1454.54             | 578.51  | 363.63  | 181.82  |
| 0.90                      | 0.50                          | 1.00                                                | 450000.00           | 77669.08                  | 1826.81       | 3711.21           | 94.97      | 2909.93             | 1157.36 | 727.48  | 363.74  |
| 0.90                      | 0.50                          | 1.50                                                | 450000.00           | 61776.59                  | 1394.35       | 2842.89           | 94.15      | 4308.47             | 1713.60 | 1077.12 | 538.56  |
| 0.90                      | 0.50                          | 2.00                                                | 450000.00           | 47568.23                  | 1043.37       | 2132.43           | 92.41      | 5558.81             | 2210.89 | 1389.70 | 694.85  |
| 0.90                      | 0.50                          | 2.50                                                | 450000.00           | 36449.84                  | 776.48        | 1588.83           | 89.76      | 6537.23             | 2600.03 | 1634.31 | 817.15  |
| 0.90                      | 0.50                          | 3.00                                                | 450000.00           | 28808.50                  | 584.55        | 1196.15           | 86.49      | 7209.67             | 2867.48 | 1802.42 | 901.21  |
| 0.90                      | 0.50                          | 3.50                                                | 450000.00           | 23739.71                  | 450.96        | 922.02            | 82.99      | 7655.72             | 3044.89 | 1913.93 | 956.97  |
| 0.90                      | 0.50                          | 4.00                                                | 450000.00           | 20286.17                  | 358.64        | 732.19            | 79.57      | 7959.63             | 3165.76 | 1989.91 | 994.95  |

54  
 55  
 56  
 57



64 **Table S2.** (continuation) Effect of different vaccination scenarios in relevant indicators of  
 65 the local evolution of pandemic COVID-19.  
 66

| Vaccination parameters    |                               |                                                     |                     | Local pandemic indicators |               |                   |            | Case fatality rates |         |         |        |
|---------------------------|-------------------------------|-----------------------------------------------------|---------------------|---------------------------|---------------|-------------------|------------|---------------------|---------|---------|--------|
| $\eta$ : Vaccine Efficacy | $\phi$ : Vaccination Coverage | vaccination rate ( $\gamma$ Po year <sup>-1</sup> ) | vaccine equivalents | max_symptomatic           | max_new cases | max_bed occupancy | peak @ day | 0.09                | 0.04    | 0.02    | 0.01   |
| 0.62                      | 0.50                          | 0.50                                                | 310000.00           | 99372.32                  | 2496.95       | 5041.29           | 94.97      | 1000.05             | 397.75  | 250.01  | 125.01 |
| 0.62                      | 0.50                          | 1.00                                                | 310000.00           | 87933.24                  | 2131.99       | 4319.25           | 95.09      | 2006.69             | 798.11  | 501.67  | 250.84 |
| 0.62                      | 0.50                          | 1.50                                                | 310000.00           | 76582.75                  | 1795.65       | 3648.91           | 94.94      | 3005.53             | 1195.38 | 751.38  | 375.69 |
| 0.62                      | 0.50                          | 2.00                                                | 310000.00           | 65728.32                  | 1492.88       | 3041.42           | 94.43      | 3960.72             | 1575.29 | 990.18  | 495.09 |
| 0.62                      | 0.50                          | 2.50                                                | 310000.00           | 56693.31                  | 1227.87       | 2506.54           | 93.49      | 4755.80             | 1891.51 | 1188.95 | 594.48 |
| 0.62                      | 0.50                          | 3.00                                                | 310000.00           | 50567.30                  | 1003.01       | 2050.41           | 92.10      | 5294.89             | 2105.92 | 1323.72 | 661.86 |
| 0.62                      | 0.50                          | 3.50                                                | 310000.00           | 46817.60                  | 818.05        | 1673.69           | 90.29      | 5624.87             | 2237.16 | 1406.22 | 703.11 |
| 0.62                      | 0.50                          | 4.00                                                | 310000.00           | 44503.25                  | 669.98        | 1393.69           | 92.75      | 5828.53             | 2318.16 | 1457.13 | 728.57 |
| 0.62                      | 0.60                          | 0.50                                                | 372000.00           | 99372.32                  | 2496.95       | 5041.29           | 94.97      | 1000.05             | 397.75  | 250.01  | 125.01 |
| 0.62                      | 0.60                          | 1.00                                                | 372000.00           | 87933.24                  | 2131.99       | 4319.25           | 95.09      | 2006.69             | 798.11  | 501.67  | 250.84 |
| 0.62                      | 0.60                          | 1.50                                                | 372000.00           | 76580.27                  | 1795.65       | 3648.91           | 94.94      | 3005.75             | 1195.47 | 751.44  | 375.72 |
| 0.62                      | 0.60                          | 2.00                                                | 372000.00           | 65565.51                  | 1492.88       | 3041.42           | 94.43      | 3975.05             | 1580.99 | 993.76  | 496.88 |
| 0.62                      | 0.60                          | 2.50                                                | 372000.00           | 55406.80                  | 1227.87       | 2506.54           | 93.49      | 4869.02             | 1936.54 | 1217.25 | 608.63 |
| 0.62                      | 0.60                          | 3.00                                                | 372000.00           | 47031.02                  | 1003.01       | 2050.41           | 92.10      | 5606.08             | 2229.69 | 1401.52 | 700.76 |
| 0.62                      | 0.60                          | 3.50                                                | 372000.00           | 40889.05                  | 818.05        | 1673.69           | 90.29      | 6146.58             | 2444.66 | 1536.64 | 768.32 |
| 0.62                      | 0.60                          | 4.00                                                | 372000.00           | 36610.34                  | 669.98        | 1371.10           | 88.14      | 6523.10             | 2594.42 | 1630.78 | 815.39 |
| 0.62                      | 0.70                          | 0.50                                                | 434000.00           | 99372.32                  | 2496.95       | 5041.29           | 94.97      | 1000.05             | 397.75  | 250.01  | 125.01 |
| 0.62                      | 0.70                          | 1.00                                                | 434000.00           | 87933.24                  | 2131.99       | 4319.25           | 95.09      | 2006.69             | 798.11  | 501.67  | 250.84 |
| 0.62                      | 0.70                          | 1.50                                                | 434000.00           | 76580.23                  | 1795.65       | 3648.91           | 94.94      | 3005.75             | 1195.47 | 751.44  | 375.72 |
| 0.62                      | 0.70                          | 2.00                                                | 434000.00           | 65553.86                  | 1492.88       | 3041.42           | 94.43      | 3976.07             | 1581.39 | 994.02  | 497.01 |
| 0.62                      | 0.70                          | 2.50                                                | 434000.00           | 55185.28                  | 1227.87       | 2506.54           | 93.49      | 4888.51             | 1944.29 | 1222.13 | 611.06 |
| 0.62                      | 0.70                          | 3.00                                                | 434000.00           | 45977.69                  | 1003.01       | 2050.41           | 92.10      | 5698.78             | 2266.56 | 1424.69 | 712.35 |
| 0.62                      | 0.70                          | 3.50                                                | 434000.00           | 38453.92                  | 818.05        | 1673.69           | 90.29      | 6360.87             | 2529.89 | 1590.22 | 795.11 |
| 0.62                      | 0.70                          | 4.00                                                | 434000.00           | 32703.07                  | 669.98        | 1371.10           | 88.14      | 6866.94             | 2731.17 | 1716.74 | 858.37 |

67
